# Supplementary material
Source: PubMed Central journal article supplement (PMC3613908)
Supplement: JCI64551sd.pdf [file JCI64551sd.pdf]

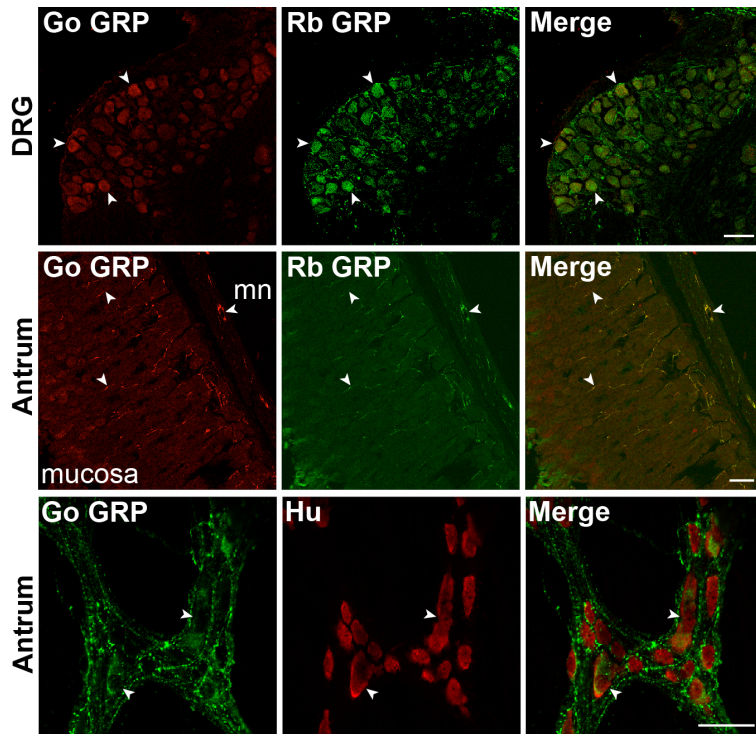

**Supplement Figure 1. Localization of GRP in mouse DRG and gastric antrum.** Sections of DRG (upper panels) and gastric antrum (middle panels) were incubated with goat (Go) and rabbit (Rb) GRP antibodies. The antibodies stained the same DRG neurons, and also stained the same myenteric neurons (mn) and mucosal nerve fibers in the gastric antrum (arrowheads). The goat GRP antibody stained Hu-positive myenteric neurons (arrowheads) and nerve fibers in a wholemount preparation of gastric antrum (lower panels). Scale bars, 50  $\mu$ m.
